# Supplementary material
Source: PubMed Central journal article supplement (PMC9338427)
Supplement: NIHMS1809189-supplement-Supplement__Table_5.pdf [file NIHMS1809189-supplement-Supplement__Table_5.pdf]

**Supplementary Table 5 Other bacteria harboring homologs of *C. novyi-NT* transposase**

| Organism name                          | Gene name                                         | GenBank accession number       | Amino acid identity shared with <i>C. novyi-NT</i> transposase | e-value   |
|----------------------------------------|---------------------------------------------------|--------------------------------|----------------------------------------------------------------|-----------|
| Burkholderia pseudomallei 1106b        | ISBma2, transposase                               | gi 76578622 gb ABA48097.1      | 235/449 (52%)                                                  | 2.00E-133 |
| Burkholderia pseudomallei Pasteur      | hypothetical protein BpseP_03005657               | gi 100057141 ref ZP_01320602.1 | 234/449 (52%)                                                  | 2.00E-133 |
| Burkholderia pseudomallei 1106a        | COG3666: Transposase and inactivated derivatives  | gi 82531172 ref ZP_00890394.1  | 234/449 (52%)                                                  | 2.00E-133 |
| Burkholderia pseudomallei 406e         | hypothetical protein Bpse4_03002651               | gi 100233840 ref ZP_01334825.1 | 235/449 (52%)                                                  | 3.00E-133 |
| Burkholderia pseudomallei S13          | hypothetical protein BpseS_03000794               | gi 100125625 ref ZP_01330950.1 | 235/449 (52%)                                                  | 3.00E-133 |
| Burkholderia pseudomallei 668          | COG3666: Transposase and inactivated derivatives  | gi 67734363 ref ZP_00485543.1  | 234/449 (52%)                                                  | 3.00E-133 |
| Burkholderia mallei NCTC 10247         | COG3666: Transposase and inactivated derivatives  | gi 67649311 ref ZP_00447536.1  | 234/449 (52%)                                                  | 3.00E-133 |
| Burkholderia mallei 2002721280         | hypothetical protein Bmal2_03000364               | gi 100267723 ref ZP_01341923.1 | 234/449 (52%)                                                  | 3.00E-133 |
| Burkholderia mallei 10229              | COG3666: Transposase and inactivated derivatives  | gi 85064460 ref ZP_01025314.1  | 234/449 (52%)                                                  | 3.00E-133 |
| Burkholderia pseudomallei 1710b        | ISBma2, transposase                               | gi 76578762 gb ABA48237.1      | 235/449 (52%)                                                  | 3.00E-133 |
| Burkholderia pseudomallei 1710a        | hypothetical protein Bpse17_02002716              | gi 90292576 ref ZP_01212186.1  | 235/449 (52%)                                                  | 3.00E-133 |
| Burkholderia pseudomallei K96243       | putative transposase                              | gi 52210500 emb CAH36483.1     | 234/449 (52%)                                                  | 3.00E-133 |
| Burkholderia mallei ATCC 23344         | ISBma2, transposase                               | gi 52429788 gb AAU50381.1      | 234/449 (52%)                                                  | 4.00E-133 |
| Burkholderia mallei GB8 horse 4        | COG3666: Transposase and inactivated derivatives  | gi 67643641 ref ZP_00442386.1  | 234/449 (52%)                                                  | 4.00E-133 |
| Burkholderia mallei 10399              | hypothetical protein Bmal10_03000463              | gi 100917923 ref ZP_01346399.1 | 234/449 (52%)                                                  | 4.00E-133 |
| Burkholderia mallei SAVP1              | COG3666: Transposase and inactivated derivatives  | gi 84524109 ref ZP_01011245.1  | 234/449 (52%)                                                  | 4.00E-133 |
| Burkholderia mallei JHU                | COG3666: Transposase and inactivated derivatives  | gi 83626755 ref ZP_00936979.1  | 234/449 (52%)                                                  | 4.00E-133 |
| Burkholderia mallei FMH                | COG3666: Transposase and inactivated derivatives  | gi 83621784 ref ZP_00932192.1  | 234/449 (52%)                                                  | 4.00E-133 |
| Burkholderia pseudomallei 1655         | hypothetical protein Bpse1_03000756               | gi 99913198 ref ZP_01319856.1  | 234/449 (52%)                                                  | 5.00E-133 |
| Burkholderia dolosa AUO158             | COG3666: Transposase and inactivated derivatives  | gi 84359278 ref ZP_00984026.1  | 233/432 (53%)                                                  | 4.00E-130 |
| Burkholderia xenovorans LB400          | Putative transposase                              | gi 91781388 ref YP_556594.1    | 227/462 (49%)                                                  | 3.00E-127 |
| Symbiobacterium thermophilum IAM 14863 | transposase                                       | gi 51855596 dbj BAD39754.1     | 191/477 (40%)                                                  | 7.00E-96  |
| Thermoanaerobacter tengcongensis MB4   | transposase                                       | gi 20515501 gb AAM23791.1      | 203/447 (45%)                                                  | 1.00E-91  |
| Bacillus clausii KSM-K16               | transposase                                       | gi 56908260 dbj BAD62787.1     | 180/439 (41%)                                                  | 3.00E-89  |
| Enterococcus faecium DO                | Transposase, IS4                                  | gi 68195004 gb EAN09469.1      | 191/462 (41%)                                                  | 2.00E-87  |
| Streptococcus agalactiae A909          | ISSag8, transposase                               | gi 76563598 gb ABA46182.1      | 177/467 (37%)                                                  | 3.00E-76  |
| Streptococcus agalactiae               | transposase                                       | gi 38154362 gb AAR12164.1      | 180/459 (39%)                                                  | 6.00E-76  |
| Streptococcus pyogenes MGAS10394       | Transposase; Phage-associated cell wall hydrolase | gi 50903617 gb AAT87332.1      | 171/477 (35%)                                                  | 4.00E-74  |
| Streptococcus pyogenes MGAS2096        | Transposase                                       | gi 94992575 ref YP_600674.1    | 167/477 (35%)                                                  | 8.00E-71  |
| Streptococcus pyogenes                 | Transposase                                       | gi 10566910 dbj BAB16031.1     | 158/415 (38%)                                                  | 8.00E-69  |

The bacterial species harboring homologs of *C. novyi-NT* transposase were identified using BLASTP. Homologs were defined as those with > 30% amino acid identity over 80% of the CDS and e-value <  $e^{-20}$ .
