# Supplementary material
Source: PubMed Central journal article supplement (PMC9338427)
Supplement: NIHMS1809189-supplement-Supplement_Figure_1.pdf [file NIHMS1809189-supplement-Supplement_Figure_1.pdf]

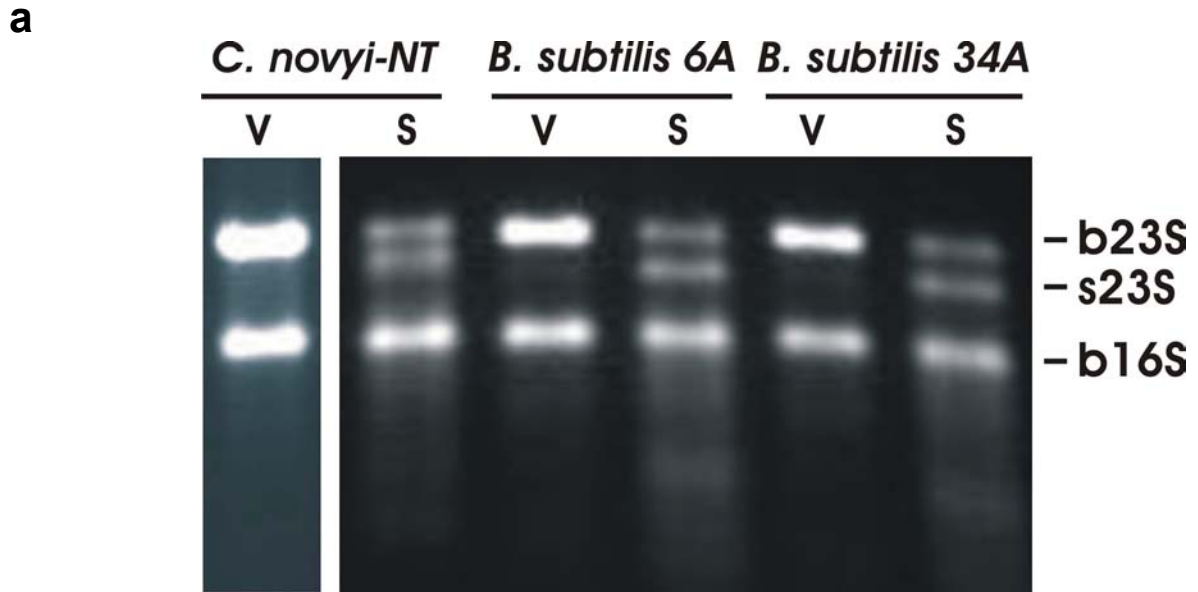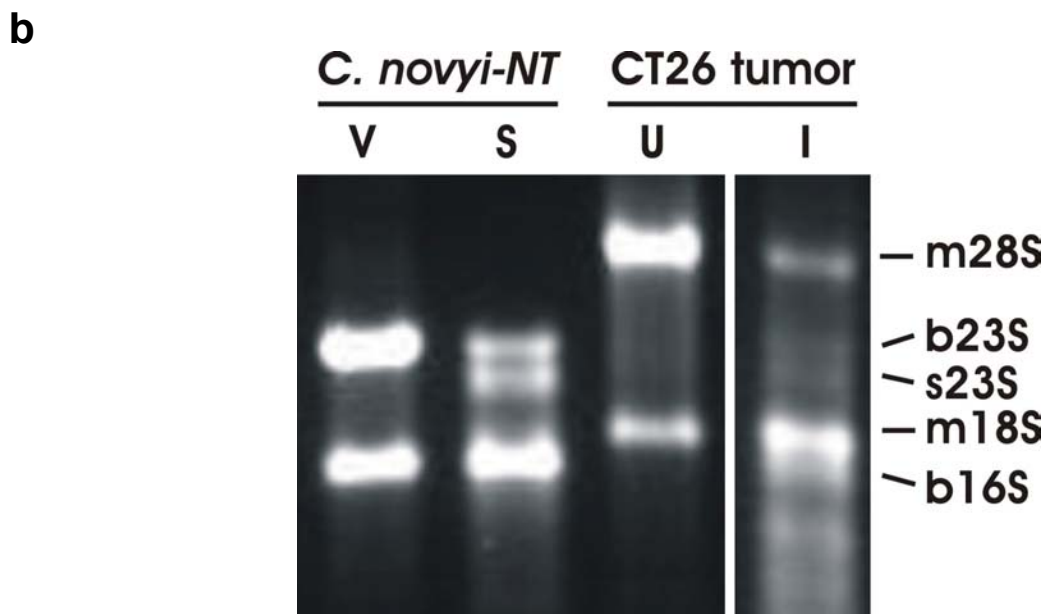

**Supplementary Figure 1** rRNA species. Total RNA from the indicated samples was separated in MOPS-formaldehyde agarose gels and stained with ethidium bromide. *B. subtilis* 6A and 34A are two different strains of *B. subtilis*. V, vegetative bacteria; S, spore form; b23S, bacterial 23S rRNA; s23S, spore-specific rRNA derived from 23S rRNA; b16S, bacterial 16S rRNA; m28S, mouse 28S rRNA; m18S, mouse 18S rRNA; U, uninfected tumor; I, *C. novyi-NT* infected tumor.
