# Supplementary material
Source: PubMed Central journal article supplement (PMC9338427)
Supplement: NIHMS1809189-supplement-Supplement_Figure_2.pdf [file NIHMS1809189-supplement-Supplement_Figure_2.pdf]

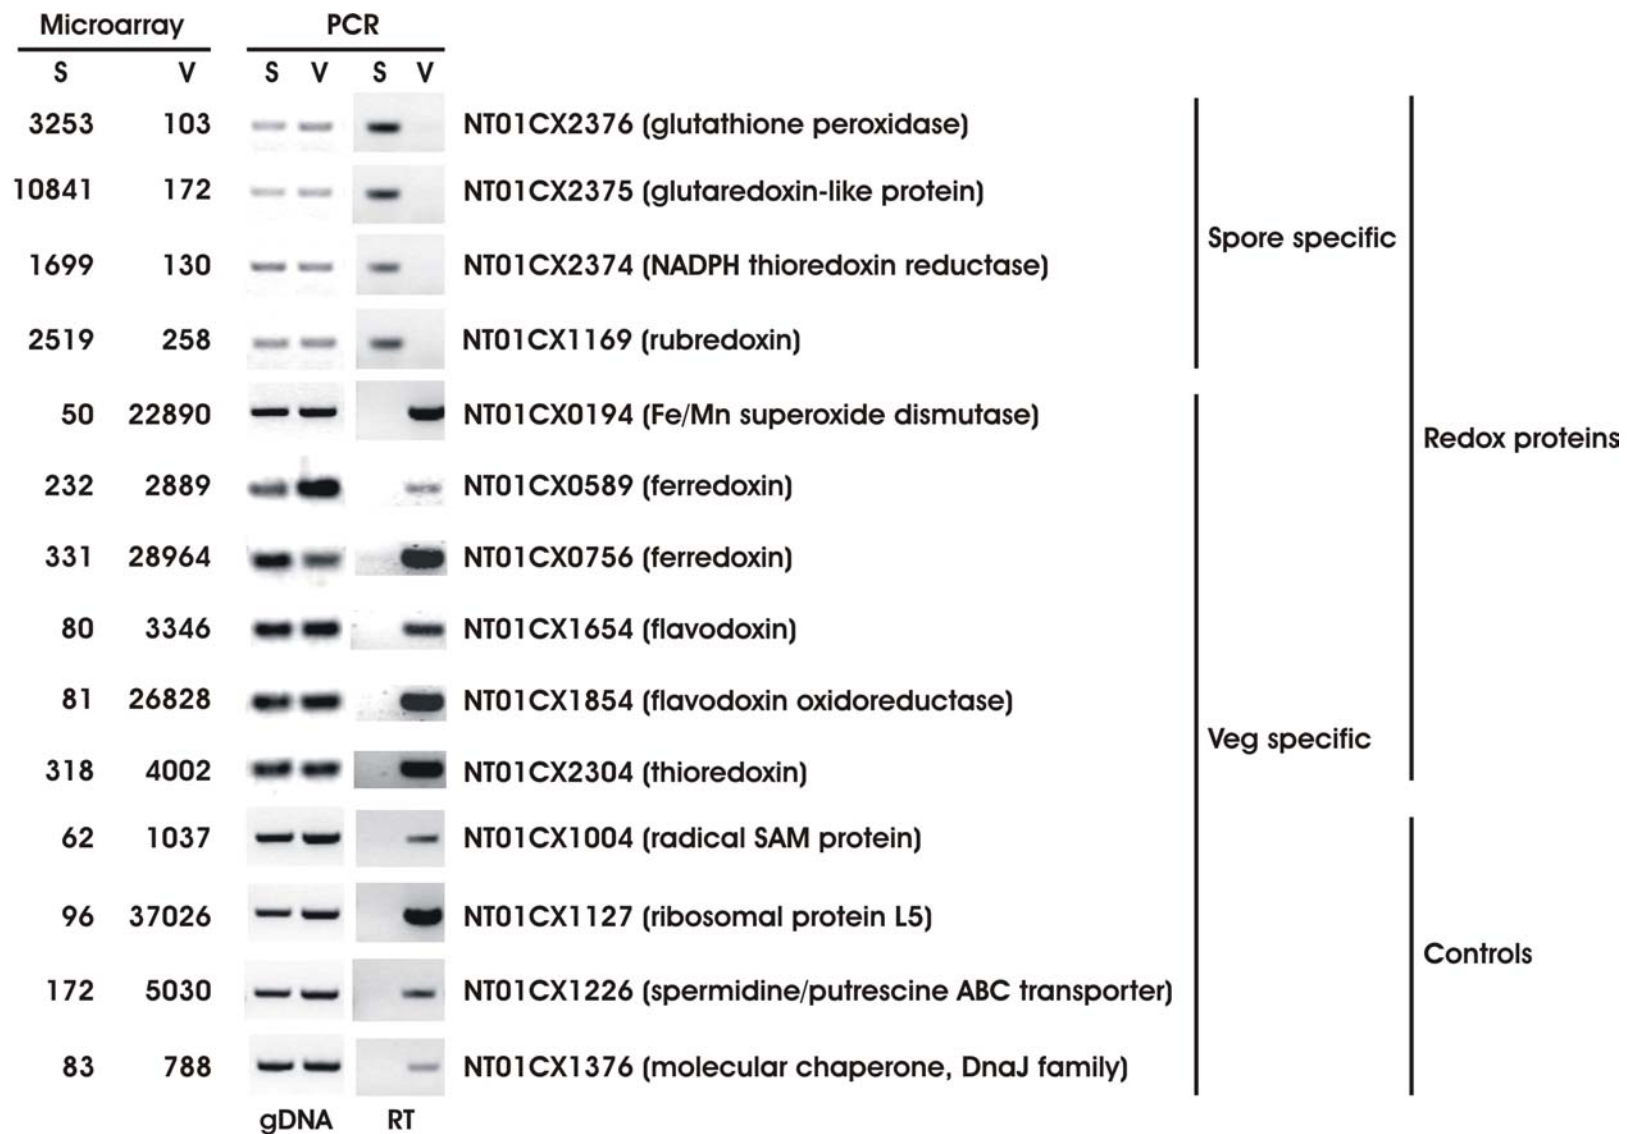

**Supplementary Figure 2** RT-PCR confirmation of selected microarray data. Reverse transcription (RT) was performed using RNA prepared from spores (S) or vegetative (V) bacteria growing at mid log phase. Genomic DNA (gDNA) was used as a control, as DNA templates should yield equal amounts of PCR product in both spores and vegetative bacteria.
