# Supplementary material
Source: PubMed Central journal article supplement (PMC9338427)
Supplement: NIHMS1809189-supplement-Supplement_Figure_3.pdf [file NIHMS1809189-supplement-Supplement_Figure_3.pdf]

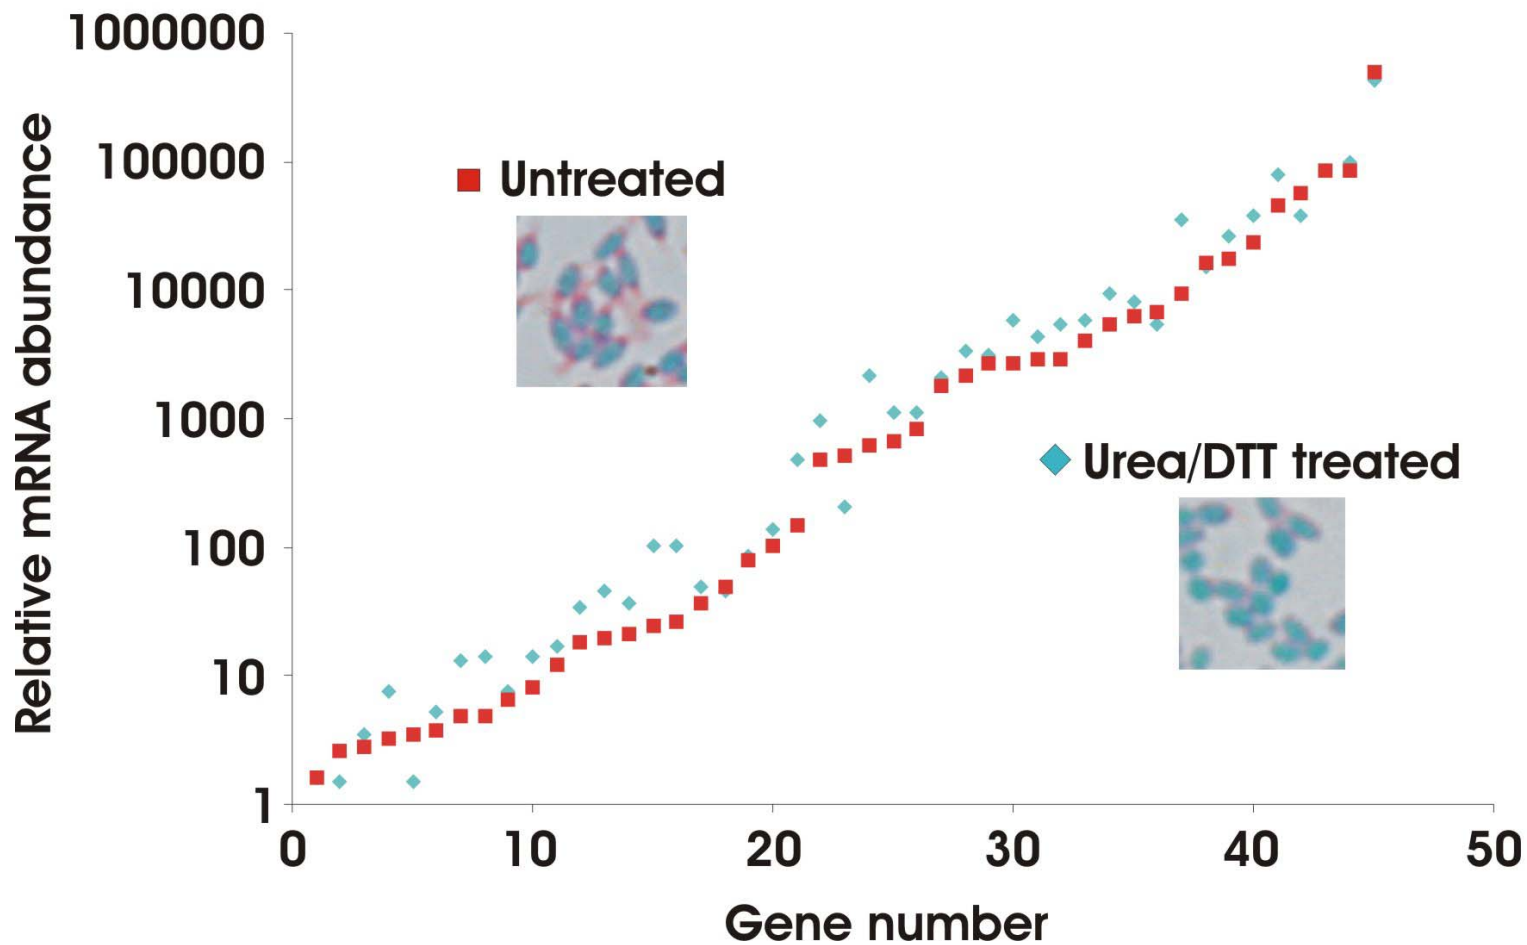

**Supplementary Figure 3** Transcript abundance in denuded spores. Reverse transcription was performed using RNA prepared from spores, either untreated or treated with urea and DTT to remove the exosporium. Real-time PCR was used to quantify the levels of 45 transcripts present at various levels, ranging from just over background to highly abundant. Inserts represent photographs of spores stained with malachite green and eosin Y. Most of the eosin Y staining (red) is in the exosporium, which is removed by the urea/DTT treatment.
