# Supplementary material
Source: PubMed Central journal article supplement (PMC9338427)
Supplement: NIHMS1809189-supplement-Supplement_Table_3.pdf [file NIHMS1809189-supplement-Supplement_Table_3.pdf]

**Supplementary Table 3 Hypothetical CDS unique to *C. novyi-NT***

| Gene ID    | CDS size (bp) | mRNA Abundance  |               |                |       |                 |               |                   |                 |
|------------|---------------|-----------------|---------------|----------------|-------|-----------------|---------------|-------------------|-----------------|
|            |               | Early log phase | Mid log phase | Late log phase | Spore | Infected HCT116 | Infected CT26 | Uninfected HCT116 | Uninfected CT26 |
| NT01CX0046 | 501           | 2162            | 2815          | 2098           | 620   | 318             | 345           | 51                | 90              |
| NT01CX0049 | 288           | 1035            | 400           | 1063           | 402   | 199             | 283           | 187               | 105             |
| NT01CX0069 | 237           | 4718            | 4795          | 3224           | 101   | 199             | 185           | 68                | 75              |
| NT01CX0080 | 327           | 35520           | 33692         | 35206          | 83    | 3047            | 2319          | 78                | 71              |
| NT01CX0091 | 657           | 593             | 900           | 1067           | 42    | 119             | 95            | 90                | 68              |
| NT01CX0113 | 504           | 148             | 86            | 127            | 70    | 65              | 77            | 53                | 50              |
| NT01CX0117 | 117           | 2459            | 1009          | 4442           | 2211  | 1158            | 1808          | 809               | 767             |
| NT01CX0118 | 405           | 368             | 335           | 389            | 138   | 84              | 110           | 93                | 77              |
| NT01CX0119 | 486           | 685             | 735           | 557            | 54    | 93              | 179           | 107               | 106             |
| NT01CX0122 | 213           | 190             | 259           | 186            | 47    | 54              | 64            | 44                | 73              |
| NT01CX0131 | 210           | 671             | 319           | 573            | 556   | 341             | 513           | 265               | 288             |
| NT01CX0207 | 315           | 3281            | 4434          | 3053           | 50    | 167             | 125           | 79                | 47              |
| NT01CX0249 | 168           | 390             | 412           | 199            | 60    | 147             | 167           | 59                | 53              |
| NT01CX0298 | 132           | 154             | 94            | 131            | 57    | 51              | 44            | 41                | 47              |
| NT01CX0303 | 210           | 2113            | 2118          | 776            | 69    | 117             | 134           | 86                | 73              |
| NT01CX0306 | 633           | 4082            | 2241          | 3721           | 50    | 124             | 79            | 73                | 60              |
| NT01CX0314 | 216           | 14273           | 15190         | 2346           | 112   | 587             | 527           | 110               | 86              |
| NT01CX0315 | 153           | 238             | 81            | 302            | 3716  | 205             | 504           | 245               | 483             |
| NT01CX0318 | 291           | 784             | 848           | 844            | 233   | 141             | 194           | 280               | 130             |
| NT01CX0324 | 165           | 32              | 60            | 56             | 36    | 35              | 83            | 65                | 89              |
| NT01CX0325 | 423           | 8320            | 12191         | 6648           | 105   | 828             | 429           | 114               | 132             |
| NT01CX0352 | 975           | 1410            | 2096          | 2041           | 62    | 76              | 65            | 53                | 54              |
| NT01CX0360 | 858           | 2653            | 2224          | 2532           | 122   | 156             | 129           | 79                | 81              |
| NT01CX0365 | 663           | 123             | 128           | 109            | 1959  | 686             | 1206          | 46                | 54              |
| NT01CX0438 | 2076          | 902             | 1945          | 934            | 66    | 168             | 198           | 91                | 53              |
| NT01CX0456 | 126           | 215             | 349           | 307            | 109   | 95              | 67            | 67                | 55              |
| NT01CX0461 | 738           | 282             | 460           | 277            | 68    | 55              | 69            | 49                | 46              |
| NT01CX0479 | 654           | 1003            | 919           | 523            | 87    | 58              | 66            | 57                | 73              |
| NT01CX0596 | 93            | 451             | 626           | 577            | 2728  | 3042            | 2189          | 100               | 89              |
| NT01CX0599 | 171           | 101             | 109           | 99             | 51    | 71              | 85            | 61                | 52              |
| NT01CX0664 | 219           | 776             | 644           | 712            | 1396  | 474             | 513           | 121               | 165             |
| NT01CX0677 | 384           | 1187            | 1374          | 785            | 137   | 95              | 131           | 70                | 68              |
| NT01CX0694 | 705           | 1724            | 3515          | 2083           | 96    | 133             | 142           | 75                | 86              |
| NT01CX0734 | 783           | 462             | 2129          | 700            | 134   | 60              | 68            | 109               | 63              |
| NT01CX0740 | 357           | 335             | 2190          | 539            | 1296  | 346             | 364           | 118               | 127             |
| NT01CX0741 | 1047          | 350             | 1913          | 1027           | 94    | 271             | 276           | 140               | 69              |
| NT01CX0752 | 843           | 3331            | 3909          | 3439           | 57    | 142             | 153           | 60                | 85              |
| NT01CX0805 | 186           | 357             | 249           | 233            | 607   | 203             | 295           | 126               | 132             |
| NT01CX0833 | 1824          | 1854            | 1683          | 1435           | 131   | 90              | 131           | 72                | 83              |
| NT01CX0839 | 309           | 182             | 114           | 320            | 123   | 103             | 139           | 176               | 98              |
| NT01CX0842 | 105           | 567             | 705           | 518            | 69    | 66              | 73            | 61                | 68              |
| NT01CX0900 | 237           | 1104            | 3722          | 2541           | 97    | 591             | 275           | 98                | 141             |
| NT01CX0919 | 1731          | 1390            | 3147          | 1575           | 118   | 185             | 249           | 206               | 201             |
| NT01CX0940 | 456           | 2303            | 10338         | 10177          | 176   | 220             | 325           | 57                | 50              |
| NT01CX0975 | 474           | 361             | 1164          | 347            | 53    | 52              | 52            | 46                | 53              |
| NT01CX0988 | 225           | 459             | 181           | 227            | 163   | 5693            | 6236          | 77                | 106             |
| NT01CX0991 | 573           | 81              | 77            | 99             | 53    | 72              | 65            | 51                | 49              |
| NT01CX1041 | 387           | 16631           | 21791         | 19898          | 175   | 954             | 453           | 99                | 92              |
| NT01CX1177 | 414           | 497             | 262           | 332            | 75    | 102             | 73            | 90                | 86              |
| NT01CX1179 | 936           | 239             | 463           | 174            | 46    | 56              | 52            | 54                | 51              |
| NT01CX1197 | 312           | 1159            | 833           | 1129           | 160   | 350             | 300           | 156               | 128             |
| NT01CX1224 | 96            | 553             | 411           | 753            | 348   | 604             | 706           | 344               | 334             |
| NT01CX1234 | 606           | 237             | 188           | 335            | 112   | 79              | 112           | 111               | 111             |
| NT01CX1279 | 93            | 1758            | 2465          | 1564           | 184   | 125             | 116           | 74                | 88              |
| NT01CX1337 | 456           | 792             | 413           | 1715           | 1314  | 1512            | 1638          | 234               | 324             |
| NT01CX1356 | 840           | 535             | 1753          | 1045           | 85    | 81              | 118           | 86                | 70              |
| NT01CX1371 | 93            | 6426            | 4843          | 4975           | 112   | 331             | 234           | 112               | 136             |
| NT01CX1422 | 195           | 73              | 292           | 115            | 49    | 72              | 73            | 42                | 43              |
| NT01CX1435 | 1995          | 3001            | 4939          | 3255           | 112   | 160             | 113           | 125               | 92              |
| NT01CX1436 | 102           | 4253            | 2787          | 4939           | 1601  | 691             | 1064          | 401               | 517             |
| NT01CX1517 | 1152          | 28852           | 33091         | 30339          | 51    | 3204            | 3149          | 67                | 76              |
| NT01CX1529 | 1125          | 7516            | 7198          | 7118           | 103   | 162             | 189           | 70                | 101             |
| NT01CX1535 | 2175          | 6010            | 3173          | 5444           | 130   | 125             | 98            | 60                | 78              |
| NT01CX1538 | 924           | 4775            | 5271          | 5182           | 263   | 154             | 168           | 117               | 94              |
| NT01CX1555 | 1053          | 1936            | 1984          | 2616           | 117   | 83              | 87            | 91                | 88              |
| NT01CX1556 | 4461          | 5334            | 7246          | 7577           | 93    | 130             | 153           | 59                | 76              |
| NT01CX1558 | 642           | 13810           | 18124         | 14319          | 50    | 317             | 229           | 79                | 92              |
| NT01CX1571 | 174           | 1547            | 1340          | 1504           | 9323  | 740             | 1110          | 243               | 143             |

|            |      |      |      |       |       |      |      |     |     |
|------------|------|------|------|-------|-------|------|------|-----|-----|
| NT01CX1590 | 162  | 2949 | 2921 | 1842  | 379   | 515  | 588  | 765 | 568 |
| NT01CX1599 | 696  | 289  | 238  | 471   | 305   | 86   | 111  | 182 | 167 |
| NT01CX1616 | 693  | 128  | 117  | 164   | 161   | 140  | 129  | 85  | 52  |
| NT01CX1624 | 300  | 2340 | 2791 | 2871  | 403   | 180  | 304  | 101 | 191 |
| NT01CX1628 | 294  | 645  | 597  | 901   | 55    | 104  | 65   | 135 | 75  |
| NT01CX1634 | 465  | 296  | 144  | 230   | 253   | 2200 | 2185 | 135 | 132 |
| NT01CX1635 | 729  | 265  | 179  | 284   | 680   | 1544 | 1765 | 58  | 90  |
| NT01CX1660 | 198  | 1288 | 1530 | 1033  | 66    | 142  | 82   | 292 | 96  |
| NT01CX1668 | 759  | 94   | 84   | 97    | 2472  | 816  | 854  | 42  | 49  |
| NT01CX1670 | 330  | 299  | 125  | 393   | 1233  | 1063 | 1249 | 129 | 220 |
| NT01CX1671 | 156  | 233  | 131  | 269   | 177   | 93   | 144  | 115 | 86  |
| NT01CX1672 | 153  | 62   | 78   | 61    | 40    | 37   | 32   | 46  | 51  |
| NT01CX1682 | 495  | 586  | 526  | 471   | 125   | 173  | 265  | 80  | 82  |
| NT01CX1697 | 438  | 2481 | 5172 | 2779  | 269   | 430  | 271  | 52  | 47  |
| NT01CX1712 | 618  | 509  | 680  | 699   | 56    | 62   | 64   | 49  | 55  |
| NT01CX1715 | 666  | 293  | 136  | 462   | 366   | 168  | 190  | 85  | 61  |
| NT01CX1728 | 153  | 4532 | 3345 | 6544  | 1478  | 1020 | 1132 | 504 | 797 |
| NT01CX1731 | 144  | 1565 | 1053 | 2114  | 1101  | 560  | 1023 | 482 | 540 |
| NT01CX1770 | 606  | 190  | 174  | 119   | 15981 | 3999 | 6159 | 130 | 102 |
| NT01CX1794 | 1485 | 3774 | 2978 | 3337  | 45    | 72   | 88   | 73  | 56  |
| NT01CX1812 | 123  | 74   | 55   | 48    | 45    | 35   | 41   | 37  | 39  |
| NT01CX1822 | 315  | 127  | 74   | 66    | 62    | 87   | 125  | 56  | 61  |
| NT01CX1829 | 369  | 104  | 115  | 87    | 1638  | 376  | 337  | 65  | 58  |
| NT01CX1880 | 339  | 5184 | 6212 | 7258  | 102   | 135  | 135  | 65  | 86  |
| NT01CX1889 | 465  | 1638 | 1845 | 1731  | 88    | 88   | 95   | 73  | 67  |
| NT01CX1925 | 207  | 9538 | 7231 | 11763 | 899   | 608  | 719  | 220 | 570 |
| NT01CX1962 | 441  | 106  | 80   | 102   | 62    | 52   | 56   | 53  | 44  |
| NT01CX1964 | 477  | 1234 | 314  | 1579  | 830   | 296  | 437  | 388 | 507 |
| NT01CX1965 | 417  | 79   | 96   | 94    | 58    | 68   | 81   | 46  | 64  |
| NT01CX1992 | 222  | 307  | 430  | 366   | 2146  | 129  | 101  | 61  | 39  |
| NT01CX1998 | 444  | 89   | 61   | 73    | 58    | 55   | 71   | 48  | 64  |
| NT01CX2001 | 102  | 1261 | 2389 | 1633  | 84    | 72   | 110  | 76  | 68  |
| NT01CX2002 | 150  | 1475 | 2301 | 2259  | 49    | 88   | 84   | 58  | 55  |
| NT01CX2003 | 183  | 2956 | 3353 | 4441  | 1223  | 790  | 860  | 574 | 605 |
| NT01CX2009 | 444  | 1166 | 1796 | 1622  | 77    | 98   | 105  | 72  | 79  |
| NT01CX2018 | 192  | 576  | 274  | 543   | 31330 | 1732 | 2790 | 135 | 225 |
| NT01CX2019 | 243  | 223  | 112  | 152   | 39    | 47   | 49   | 51  | 49  |
| NT01CX2020 | 327  | 4810 | 1663 | 3345  | 286   | 179  | 210  | 119 | 138 |
| NT01CX2037 | 210  | 191  | 114  | 188   | 1735  | 718  | 847  | 56  | 60  |
| NT01CX2040 | 276  | 2353 | 5832 | 9429  | 674   | 1452 | 1076 | 105 | 105 |
| NT01CX2056 | 789  | 1806 | 3977 | 2485  | 72    | 153  | 121  | 47  | 53  |
| NT01CX2059 | 177  | 2496 | 1738 | 1884  | 50    | 141  | 85   | 68  | 38  |
| NT01CX2061 | 153  | 2678 | 4679 | 3759  | 153   | 494  | 499  | 150 | 175 |
| NT01CX2064 | 93   | 352  | 102  | 210   | 39    | 107  | 99   | 121 | 122 |
| NT01CX2166 | 378  | 281  | 230  | 317   | 91    | 87   | 172  | 87  | 151 |
| NT01CX2167 | 258  | 105  | 61   | 97    | 64    | 50   | 67   | 93  | 55  |
| NT01CX2175 | 510  | 1924 | 3359 | 2632  | 110   | 114  | 91   | 121 | 46  |
| NT01CX2176 | 225  | 1193 | 546  | 754   | 109   | 130  | 115  | 78  | 89  |
| NT01CX2183 | 522  | 478  | 1957 | 1081  | 261   | 85   | 82   | 69  | 46  |
| NT01CX2184 | 150  | 170  | 98   | 171   | 45    | 67   | 94   | 106 | 70  |
| NT01CX2185 | 765  | 559  | 201  | 620   | 298   | 139  | 190  | 164 | 85  |
| NT01CX2188 | 108  | 779  | 292  | 973   | 379   | 180  | 230  | 280 | 184 |
| NT01CX2189 | 189  | 255  | 158  | 393   | 228   | 143  | 161  | 60  | 73  |
| NT01CX2194 | 282  | 1411 | 570  | 2106  | 840   | 336  | 456  | 309 | 343 |
| NT01CX2196 | 156  | 213  | 147  | 416   | 89    | 86   | 73   | 107 | 71  |
| NT01CX2202 | 1083 | 4903 | 6499 | 5804  | 147   | 120  | 180  | 129 | 135 |
| NT01CX2227 | 273  | 158  | 156  | 119   | 46    | 54   | 48   | 49  | 59  |
| NT01CX2296 | 495  | 1672 | 1915 | 1317  | 84    | 94   | 107  | 46  | 91  |
| NT01CX2327 | 384  | 1021 | 1632 | 667   | 950   | 339  | 214  | 84  | 61  |
| NT01CX2332 | 213  | 277  | 525  | 169   | 115   | 144  | 155  | 63  | 71  |
| NT01CX2358 | 603  | 474  | 822  | 526   | 45    | 156  | 114  | 74  | 58  |
| NT01CX2362 | 492  | 1287 | 440  | 585   | 956   | 608  | 731  | 102 | 178 |
| NT01CX2363 | 1095 | 453  | 326  | 357   | 273   | 1714 | 1741 | 84  | 102 |
| NT01CX2364 | 222  | 1046 | 349  | 356   | 189   | 160  | 208  | 97  | 176 |
| NT01CX2367 | 1521 | 2745 | 3655 | 2667  | 46    | 93   | 66   | 53  | 45  |
| NT01CX2393 | 267  | 291  | 555  | 762   | 278   | 177  | 236  | 59  | 169 |
| NT01CX2394 | 135  | 168  | 224  | 233   | 64    | 74   | 101  | 48  | 82  |
| NT01CX2399 | 720  | 231  | 264  | 354   | 49    | 173  | 165  | 97  | 144 |
| NT01CX2404 | 1020 | 332  | 895  | 448   | 55    | 40   | 47   | 91  | 41  |
| NT01CX2415 | 2067 | 1142 | 1261 | 1036  | 105   | 66   | 91   | 61  | 49  |
| NT01CX2432 | 507  | 87   | 72   | 114   | 57    | 42   | 50   | 38  | 40  |
