# Supplementary material
Source: PubMed Central journal article supplement (PMC9338427)
Supplement: NIHMS1809189-supplement-Supplement_Table_4.pdf [file NIHMS1809189-supplement-Supplement_Table_4.pdf]

Supplementary Table 4 Functional classification of *C. novyi-NT* genes

| Manatee functional class                                                        | Predicted function within its class | Distribution of genes |                              |                                      |                                 |                                   |                              |                                    |
|---------------------------------------------------------------------------------|-------------------------------------|-----------------------|------------------------------|--------------------------------------|---------------------------------|-----------------------------------|------------------------------|------------------------------------|
|                                                                                 |                                     | Common                | Unique to <i>C. novyi-NT</i> | Shared with <i>C. acetobutylicum</i> | Shared with <i>C. difficile</i> | Shared with <i>C. perfringens</i> | Shared with <i>C. tetani</i> | Total in <i>C. novyi-NT</i> genome |
| <b>Amino acid biosynthesis</b>                                                  |                                     | <b>24</b>             | <b>7</b>                     | <b>64</b>                            | <b>59</b>                       | <b>44</b>                         | <b>44</b>                    | <b>83</b>                          |
|                                                                                 | Aromatic amino acid family          | 5                     | 2                            | 10                                   | 9                               | 7                                 | 6                            | 14                                 |
|                                                                                 | Aspartate family                    | 9                     | 2                            | 20                                   | 20                              | 14                                | 18                           | 25                                 |
|                                                                                 | Glutamate family                    | 6                     |                              | 14                                   | 14                              | 13                                | 11                           | 17                                 |
|                                                                                 | Histidine family                    | 1                     |                              | 9                                    | 8                               | 2                                 | 2                            | 9                                  |
|                                                                                 | Other                               |                       |                              | 1                                    | 1                               | 1                                 | 1                            | 2                                  |
|                                                                                 | Pyruvate family                     | 1                     | 2                            | 6                                    | 4                               | 3                                 | 3                            | 9                                  |
|                                                                                 | Serine family                       | 3                     | 1                            | 6                                    | 5                               | 5                                 | 5                            | 7                                  |
| <b>Biosynthesis of cofactors, prosthetic groups, and carriers</b>               |                                     | <b>54</b>             | <b>4</b>                     | <b>85</b>                            | <b>73</b>                       | <b>82</b>                         | <b>70</b>                    | <b>102</b>                         |
| Biotin                                                                          | 2                                   |                       | 5                            | 2                                    | 4                               | 4                                 | 5                            |                                    |
| Folic acid                                                                      | 3                                   |                       | 10                           | 9                                    | 11                              | 4                                 | 11                           |                                    |
| Glutathione                                                                     |                                     |                       | 1                            |                                      | 2                               |                                   | 2                            |                                    |
| Heme, porphyrin, and cobalamin                                                  | 19                                  |                       | 28                           | 26                                   | 28                              | 30                                | 33                           |                                    |
| Menaquinone and ubiquinone                                                      | 1                                   |                       | 1                            | 1                                    | 1                               | 1                                 | 1                            |                                    |
| Other                                                                           | 8                                   |                       | 10                           | 9                                    | 9                               | 9                                 | 11                           |                                    |
| Pantothenate and coenzyme A                                                     | 4                                   | 1                     | 8                            | 7                                    | 5                               | 4                                 | 9                            |                                    |
| Pyridine nucleotides                                                            | 4                                   |                       | 8                            | 7                                    | 8                               | 5                                 | 9                            |                                    |
| Pyridoxine                                                                      | 1                                   | 1                     | 2                            | 1                                    | 1                               | 1                                 | 3                            |                                    |
| Riboflavin, FMN, and FAD                                                        | 4                                   |                       | 4                            | 4                                    | 4                               | 4                                 | 4                            |                                    |
| Thiamine                                                                        | 11                                  | 2                     | 12                           | 11                                   | 12                              | 12                                | 14                           |                                    |
| <b>Cell envelope</b>                                                            |                                     | <b>47</b>             | <b>48</b>                    | <b>112</b>                           | <b>82</b>                       | <b>116</b>                        | <b>128</b>                   | <b>219</b>                         |
| Biosynthesis and degradation of murein sacculus and peptidoglycan               |                                     |                       | 1                            |                                      | 2                               | 1                                 | 1                            | 3                                  |
| Biosynthesis and degradation of surface polysaccharides and lipopolysaccharides | 10                                  | 10                    | 36                           | 19                                   | 32                              | 35                                | 55                           |                                    |
| Biosynthesis of murein sacculus and peptidoglycan                               | 21                                  | 3                     | 36                           | 24                                   | 37                              | 39                                | 43                           |                                    |
| Other                                                                           | 11                                  | 31                    | 27                           | 27                                   | 32                              | 36                                | 84                           |                                    |
| Surface structures                                                              | 5                                   | 3                     | 16                           | 11                                   | 18                              | 20                                | 29                           |                                    |
| <b>Cellular processes</b>                                                       |                                     | <b>61</b>             | <b>26</b>                    | <b>156</b>                           | <b>115</b>                      | <b>89</b>                         | <b>159</b>                   | <b>226</b>                         |
| Adaptations to atypical conditions                                              | 17                                  | 3                     | 31                           | 21                                   | 26                              | 34                                | 38                           |                                    |
| Cell division                                                                   | 16                                  | 1                     | 22                           | 18                                   | 20                              | 23                                | 24                           |                                    |
| Chemotaxis and motility                                                         | 2                                   | 14                    | 51                           | 36                                   | 3                               | 52                                | 72                           |                                    |
| Detoxification                                                                  | 1                                   | 1                     | 4                            | 2                                    | 3                               | 3                                 | 7                            |                                    |
| DNA transformation                                                              | 2                                   |                       | 2                            | 2                                    | 3                               | 3                                 | 3                            |                                    |
| Other                                                                           | 4                                   |                       | 7                            | 5                                    | 5                               | 6                                 | 7                            |                                    |
| Pathogenesis                                                                    | 2                                   | 6                     | 6                            | 2                                    | 2                               | 6                                 | 14                           |                                    |
| Sporulation and germination                                                     | 14                                  |                       | 23                           | 17                                   | 18                              | 22                                | 23                           |                                    |
| Toxin production and resistance                                                 | 11                                  | 5                     | 24                           | 22                                   | 20                              | 24                                | 38                           |                                    |
| <b>Central intermediary metabolism</b>                                          |                                     | <b>21</b>             | <b>7</b>                     | <b>36</b>                            | <b>32</b>                       | <b>36</b>                         | <b>36</b>                    | <b>55</b>                          |
| Amino sugars                                                                    | 2                                   |                       | 3                            | 3                                    | 3                               | 2                                 | 3                            |                                    |
| Nitrogen fixation                                                               |                                     |                       |                              | 2                                    | 2                               | 2                                 | 2                            |                                    |
| Nitrogen metabolism                                                             | 2                                   |                       | 2                            | 3                                    | 5                               | 4                                 | 5                            |                                    |
| Other                                                                           | 16                                  | 7                     | 30                           | 22                                   | 23                              | 27                                | 42                           |                                    |
| Phosphorus compounds                                                            | 1                                   |                       | 1                            | 2                                    | 2                               | 1                                 | 2                            |                                    |
| Sulfur metabolism                                                               |                                     |                       |                              |                                      | 1                               |                                   | 1                            |                                    |
| <b>DNA metabolism</b>                                                           |                                     | <b>60</b>             | <b>17</b>                    | <b>77</b>                            | <b>68</b>                       | <b>70</b>                         | <b>78</b>                    | <b>110</b>                         |
| Chromosome-associated proteins                                                  | 3                                   |                       | 3                            | 3                                    | 3                               | 3                                 | 3                            |                                    |
| Degradation of DNA                                                              | 2                                   | 1                     | 3                            | 3                                    | 2                               | 3                                 | 5                            |                                    |
| DNA replication, recombination, and repair                                      | 56                                  | 12                    | 72                           | 62                                   | 66                              | 73                                | 91                           |                                    |
| Other                                                                           | 1                                   |                       | 1                            | 1                                    | 1                               | 1                                 | 1                            |                                    |
| Restriction/modification                                                        | 2                                   | 6                     | 4                            | 4                                    | 2                               | 4                                 | 10                           |                                    |
| <b>Energy metabolism</b>                                                        |                                     | <b>60</b>             | <b>28</b>                    | <b>134</b>                           | <b>131</b>                      | <b>139</b>                        | <b>139</b>                   | <b>247</b>                         |
| Aerobic                                                                         |                                     |                       |                              | 1                                    |                                 | 1                                 | 1                            |                                    |
| Amino acids and amines                                                          | 2                                   |                       | 3                            | 4                                    | 5                               | 6                                 | 6                            |                                    |
| Anaerobic                                                                       | 2                                   |                       | 4                            | 3                                    | 4                               | 5                                 | 5                            |                                    |
| ATP-proton motive force interconversion                                         | 1                                   | 2                     | 12                           | 14                                   | 16                              | 13                                | 23                           |                                    |
| Biosynthesis and degradation of polysaccharides                                 | 2                                   | 2                     | 13                           | 8                                    | 11                              | 2                                 | 17                           |                                    |
| Chemoautotrophy                                                                 |                                     |                       | 1                            | 1                                    |                                 | 1                                 | 1                            |                                    |
| Electron transport                                                              | 24                                  | 15                    | 41                           | 37                                   | 49                              | 48                                | 77                           |                                    |
| Entner-Doudoroff                                                                |                                     | 1                     | 1                            | 1                                    | 1                               |                                   | 2                            |                                    |
| Fermentation                                                                    | 5                                   | 3                     | 16                           | 17                                   | 14                              | 20                                | 33                           |                                    |
| Glycolysis/gluconeogenesis                                                      | 13                                  | 1                     | 19                           | 19                                   | 16                              | 21                                | 26                           |                                    |
| Methanogenesis                                                                  | 1                                   |                       | 1                            | 1                                    | 1                               | 1                                 | 1                            |                                    |
| Other                                                                           | 3                                   | 1                     | 7                            | 9                                    | 10                              | 9                                 | 13                           |                                    |
| Pentose phosphate pathway                                                       | 4                                   | 1                     | 5                            | 6                                    | 5                               | 5                                 | 7                            |                                    |
| Photosynthesis                                                                  | 2                                   | 1                     | 5                            | 4                                    | 4                               | 4                                 | 8                            |                                    |
| Pyruvate dehydrogenase                                                          |                                     |                       |                              |                                      |                                 |                                   | 3                            |                                    |
| Sugars                                                                          | 5                                   | 1                     | 10                           | 8                                    | 12                              | 10                                | 17                           |                                    |
| TCA cycle                                                                       | 1                                   | 1                     | 5                            | 6                                    | 2                               | 4                                 | 7                            |                                    |
| <b>Fatty acid and phospholipid metabolism</b>                                   |                                     | <b>20</b>             | <b>4</b>                     | <b>32</b>                            | <b>26</b>                       | <b>30</b>                         | <b>36</b>                    | <b>48</b>                          |
| Biosynthesis                                                                    | 17                                  | 1                     | 25                           | 21                                   | 25                              | 28                                | 32                           |                                    |
| Degradation                                                                     | 3                                   | 3                     | 8                            | 6                                    | 7                               | 10                                | 15                           |                                    |
| Other                                                                           |                                     |                       |                              |                                      |                                 | 1                                 | 1                            |                                    |

|                                                           |                                                      |            |            |             |             |             |             |             |
|-----------------------------------------------------------|------------------------------------------------------|------------|------------|-------------|-------------|-------------|-------------|-------------|
| <b>Hypothetical proteins</b>                              |                                                      | <b>32</b>  | <b>267</b> | <b>69</b>   | <b>49</b>   | <b>68</b>   | <b>79</b>   | <b>377</b>  |
|                                                           | Conserved                                            | 32         | 128        | 69          | 49          | 68          | 79          | 238         |
|                                                           | Unknown                                              |            | 139        |             |             |             |             | 139         |
| <b>Mobile and extrachromosomal element functions</b>      |                                                      | <b>3</b>   | <b>48</b>  | <b>8</b>    | <b>9</b>    | <b>7</b>    | <b>13</b>   | <b>66</b>   |
|                                                           | Other                                                | 1          | 4          | 2           | 3           | 1           | 6           | 10          |
|                                                           | Prophage functions                                   | 2          | 10         | 5           | 6           | 4           | 7           | 20          |
|                                                           | Transposon functions                                 |            | 34         | 1           |             | 2           |             | 36          |
| <b>Protein fate</b>                                       |                                                      | <b>41</b>  | <b>13</b>  | <b>74</b>   | <b>59</b>   | <b>75</b>   | <b>79</b>   | <b>115</b>  |
|                                                           | Degradation of proteins, peptides, and glycopeptides | 22         | 6          | 47          | 34          | 49          | 48          | 69          |
|                                                           | Protein and peptide secretion and trafficking        | 5          | 4          | 11          | 7           | 8           | 11          | 16          |
|                                                           | Protein folding and stabilization                    | 11         | 3          | 13          | 13          | 12          | 14          | 19          |
|                                                           | Protein modification and repair                      | 4          | 2          | 4           | 6           | 7           | 7           | 11          |
| <b>Protein synthesis</b>                                  |                                                      | <b>110</b> | <b>5</b>   | <b>135</b>  | <b>123</b>  | <b>140</b>  | <b>137</b>  | <b>157</b>  |
|                                                           | tRNA aminoacylation                                  | 1          |            | 1           | 1           | 1           | 1           | 1           |
|                                                           | Nucleoproteins                                       | 1          |            | 1           | 1           | 1           | 1           | 1           |
|                                                           | Other                                                | 2          |            | 2           | 2           | 2           | 2           | 2           |
|                                                           | Ribosomal proteins: synthesis and modification       | 51         | 4          | 65          | 58          | 68          | 65          | 78          |
|                                                           | Translation factors                                  | 13         | 1          | 15          | 15          | 17          | 15          | 18          |
|                                                           | tRNA aminoacylation                                  | 19         |            | 26          | 22          | 24          | 26          | 29          |
|                                                           | tRNA and rRNA base modification                      | 23         |            | 25          | 24          | 27          | 27          | 28          |
| <b>Purines, pyrimidines, nucleosides, and nucleotides</b> |                                                      | <b>36</b>  | <b>1</b>   | <b>50</b>   | <b>51</b>   | <b>56</b>   | <b>48</b>   | <b>61</b>   |
|                                                           | 2'-Deoxyribonucleotide metabolism                    | 1          |            | 4           | 5           | 6           | 4           | 7           |
|                                                           | Nucleotide and nucleoside interconversions           | 3          | 1          | 3           | 3           | 5           | 4           | 6           |
|                                                           | Other                                                | 3          |            | 3           | 3           | 3           | 3           | 3           |
|                                                           | Purine ribonucleotide biosynthesis                   | 13         |            | 16          | 16          | 16          | 13          | 16          |
|                                                           | Pyrimidine ribonucleotide biosynthesis               | 5          |            | 11          | 9           | 11          | 9           | 12          |
|                                                           | Salvage of nucleosides and nucleotides               | 10         |            | 12          | 14          | 14          | 14          | 16          |
|                                                           | Sugar-nucleotide biosynthesis and conversions        | 1          |            | 1           | 1           | 1           | 1           | 1           |
| <b>Regulatory functions</b>                               |                                                      | <b>30</b>  | <b>15</b>  | <b>76</b>   | <b>59</b>   | <b>67</b>   | <b>78</b>   | <b>137</b>  |
|                                                           | DNA interactions                                     | 11         | 5          | 25          | 17          | 21          | 21          | 35          |
|                                                           | Other                                                | 15         | 11         | 46          | 35          | 43          | 50          | 85          |
|                                                           | Protein interactions                                 | 2          | 2          | 4           | 6           | 3           | 5           | 9           |
|                                                           | RNA interactions                                     | 3          |            | 7           | 5           | 5           | 5           | 7           |
|                                                           | Small molecule interactions                          |            |            | 1           |             | 1           | 1           | 1           |
| <b>Signal transduction</b>                                |                                                      | <b>1</b>   | <b>5</b>   | <b>5</b>    | <b>7</b>    | <b>7</b>    | <b>8</b>    | <b>18</b>   |
|                                                           | PTS                                                  |            | 1          |             |             |             |             | 1           |
|                                                           | Two-component systems                                | 1          | 4          | 5           | 7           | 7           | 8           | 17          |
| <b>Transcription</b>                                      |                                                      | <b>35</b>  | <b>9</b>   | <b>44</b>   | <b>44</b>   | <b>42</b>   | <b>45</b>   | <b>63</b>   |
|                                                           | Degradation of RNA                                   | 6          |            | 6           | 6           | 6           | 6           | 6           |
|                                                           | DNA-dependent RNA polymerase                         | 7          | 1          | 7           | 7           | 7           | 8           | 9           |
|                                                           | Other                                                |            |            | 2           | 1           |             | 2           | 2           |
|                                                           | RNA processing                                       | 8          |            | 11          | 10          | 10          | 11          | 12          |
|                                                           | Transcription factors                                | 15         | 8          | 19          | 21          | 20          | 19          | 34          |
| <b>Transport and binding proteins</b>                     |                                                      | <b>43</b>  | <b>35</b>  | <b>108</b>  | <b>115</b>  | <b>135</b>  | <b>130</b>  | <b>256</b>  |
|                                                           | Amino acids, peptides and amines                     | 12         | 8          | 33          | 34          | 40          | 39          | 62          |
|                                                           | Anions                                               | 1          | 1          | 2           | 3           | 4           | 3           | 6           |
|                                                           | Carbohydrates, organic alcohols, and acids           | 4          | 6          | 13          | 14          | 23          | 17          | 32          |
|                                                           | Cations and iron carrying compounds                  | 11         | 5          | 23          | 31          | 36          | 37          | 51          |
|                                                           | Nucleosides, purines and pyrimidines                 | 1          |            | 2           | 2           | 4           | 2           | 5           |
|                                                           | Other                                                | 4          | 7          | 13          | 9           | 13          | 13          | 28          |
|                                                           | Unknown substrate                                    | 15         | 14         | 37          | 37          | 36          | 39          | 72          |
| <b>Unknown function</b>                                   |                                                      | <b>92</b>  | <b>53</b>  | <b>210</b>  | <b>130</b>  | <b>182</b>  | <b>217</b>  | <b>329</b>  |
|                                                           | Enzymes of unknown specificity                       | 26         | 12         | 45          | 33          | 45          | 33          | 65          |
|                                                           | General                                              | 66         | 41         | 164         | 97          | 137         | 184         | 262         |
| <b>Total</b>                                              |                                                      | <b>704</b> | <b>551</b> | <b>1338</b> | <b>1127</b> | <b>1262</b> | <b>1380</b> | <b>2325</b> |
