# Supplementary material
Source: PubMed Central journal article supplement (PMC9338427)
Supplement: NIHMS1809189-supplement-Supplement_Table_6.pdf [file NIHMS1809189-supplement-Supplement_Table_6.pdf]

**Supplementary Table 6 Functional classification of *C. novyi-NT* genes expressed in specific growth phases**

This table lists the number of genes expressed in each growth phase at levels at least 2-fold higher than any of the other growth phases listed.

| Manatee functional class                                          | Predicted function within its class                                             |           |           |          |           |                                    |
|-------------------------------------------------------------------|---------------------------------------------------------------------------------|-----------|-----------|----------|-----------|------------------------------------|
|                                                                   |                                                                                 | Early-log | Mid-log   | Late-log | Spore     | Total in <i>C. novyi-NT</i> genome |
| <b>Amino acid biosynthesis</b>                                    |                                                                                 | <b>3</b>  | <b>14</b> |          | <b>1</b>  | <b>83</b>                          |
|                                                                   | Aromatic amino acid family                                                      |           | 2         |          |           | 14                                 |
|                                                                   | Aspartate family                                                                |           | 3         |          | 1         | 25                                 |
|                                                                   | Glutamate family                                                                | 1         | 2         |          |           | 17                                 |
|                                                                   | Histidine family                                                                |           | 4         |          |           | 9                                  |
|                                                                   | Other                                                                           |           |           |          |           | 2                                  |
|                                                                   | Pyruvate family                                                                 |           | 3         |          |           | 9                                  |
|                                                                   | Serine family                                                                   | 2         |           |          |           | 7                                  |
| <b>Biosynthesis of cofactors, prosthetic groups, and carriers</b> |                                                                                 | <b>9</b>  | <b>4</b>  |          | <b>2</b>  | <b>102</b>                         |
|                                                                   | Biotin                                                                          | 1         |           |          |           | 5                                  |
|                                                                   | Folic acid                                                                      |           |           |          |           | 11                                 |
|                                                                   | Glutathione                                                                     |           |           |          | 1         | 2                                  |
|                                                                   | Heme, porphyrin, and cobalamin                                                  | 5         | 2         |          |           | 33                                 |
|                                                                   | Menaquinone and ubiquinone                                                      |           |           |          |           | 1                                  |
|                                                                   | Other                                                                           | 1         |           |          |           | 11                                 |
|                                                                   | Pantothenate and coenzyme A                                                     |           | 1         |          | 1         | 9                                  |
|                                                                   | Pyridine nucleotides                                                            |           | 1         |          |           | 9                                  |
|                                                                   | Pyridoxine                                                                      | 1         |           |          |           | 3                                  |
|                                                                   | Riboflavin, FMN, and FAD                                                        |           |           |          |           | 4                                  |
| Thiamine                                                          | 1                                                                               |           |           |          | 14        |                                    |
| <b>Cell envelope</b>                                              |                                                                                 | <b>2</b>  | <b>7</b>  |          | <b>13</b> | <b>219</b>                         |
|                                                                   | Biosynthesis and degradation of murein sacculus and peptidoglycan               |           |           |          |           | 3                                  |
|                                                                   | Biosynthesis and degradation of surface polysaccharides and lipopolysaccharides |           |           |          | 4         | 60                                 |
|                                                                   | Biosynthesis of murein sacculus and peptidoglycan                               |           |           |          | 6         | 43                                 |
|                                                                   | Other                                                                           | 1         | 6         |          | 2         | 84                                 |
|                                                                   | Surface structures                                                              | 1         | 1         |          | 1         | 29                                 |
| <b>Cellular processes</b>                                         |                                                                                 | <b>4</b>  | <b>5</b>  |          | <b>7</b>  | <b>226</b>                         |
|                                                                   | Adaptations to atypical conditions                                              |           |           |          | 5         | 38                                 |
|                                                                   | Cell division                                                                   |           | 1         |          |           | 24                                 |
|                                                                   | Chemotaxis and motility                                                         |           | 1         |          |           | 72                                 |
|                                                                   | Detoxification                                                                  |           |           |          | 2         | 7                                  |
|                                                                   | DNA transformation                                                              |           |           |          |           | 3                                  |
|                                                                   | Other                                                                           |           |           |          |           | 7                                  |
|                                                                   | Pathogenesis                                                                    | 1         | 1         |          |           | 14                                 |
|                                                                   | Sporulation and germination                                                     | 1         |           |          |           | 23                                 |
|                                                                   | Toxin production and resistance                                                 | 2         | 2         |          |           | 38                                 |
| <b>Central intermediary metabolism</b>                            |                                                                                 | <b>6</b>  | <b>6</b>  |          | <b>2</b>  | <b>55</b>                          |
|                                                                   | Amino sugars                                                                    |           | 2         |          |           | 3                                  |
|                                                                   | Nitrogen fixation                                                               |           |           |          |           | 2                                  |
|                                                                   | Nitrogen metabolism                                                             | 1         |           |          |           | 5                                  |
|                                                                   | Other                                                                           | 4         | 4         |          | 2         | 42                                 |
|                                                                   | Phosphorus compounds                                                            | 1         |           |          |           | 2                                  |
|                                                                   | Sulfur metabolism                                                               |           |           |          |           | 1                                  |
| <b>DNA metabolism</b>                                             |                                                                                 | <b>3</b>  | <b>4</b>  |          | <b>1</b>  | <b>110</b>                         |
|                                                                   | Chromosome-associated proteins                                                  |           |           |          |           | 3                                  |
|                                                                   | Degradation of DNA                                                              |           |           |          |           | 5                                  |
|                                                                   | DNA replication, recombination, and repair                                      | 3         | 4         |          | 1         | 91                                 |
|                                                                   | Other                                                                           |           |           |          |           | 1                                  |
| Restriction/modification                                          |                                                                                 |           |           |          | 10        |                                    |
| <b>Energy metabolism</b>                                          |                                                                                 | <b>21</b> | <b>14</b> | <b>3</b> | <b>7</b>  | <b>247</b>                         |
|                                                                   | Aerobic                                                                         | 1         |           |          |           | 1                                  |
|                                                                   | Amino acids and amines                                                          |           |           |          |           | 6                                  |
|                                                                   | Anaerobic                                                                       | 2         |           |          |           | 5                                  |
|                                                                   | ATP-proton motive force interconversion                                         | 6         |           |          |           | 23                                 |
|                                                                   | Biosynthesis and degradation of polysaccharides                                 |           | 4         |          | 1         | 17                                 |
|                                                                   | Chemoautotrophy                                                                 | 1         |           |          |           | 1                                  |
|                                                                   | Electron transport                                                              | 5         | 2         |          | 5         | 77                                 |
|                                                                   | Entner-Doudoroff                                                                |           |           |          |           | 2                                  |
|                                                                   | Fermentation                                                                    | 1         | 2         |          |           | 33                                 |
|                                                                   | Glycolysis/gluconeogenesis                                                      | 1         | 1         | 1        | 1         | 26                                 |
|                                                                   | Methanogenesis                                                                  |           |           |          |           | 1                                  |
|                                                                   | Other                                                                           | 2         | 1         | 1        |           | 13                                 |
|                                                                   | Pentose phosphate pathway                                                       |           |           |          |           | 7                                  |
|                                                                   | Photosynthesis                                                                  |           | 1         |          |           | 8                                  |
|                                                                   | Pyruvate dehydrogenase                                                          |           |           |          |           | 3                                  |
|                                                                   | Sugars                                                                          | 2         | 2         |          |           | 17                                 |
|                                                                   | TCA cycle                                                                       |           | 1         | 1        |           | 7                                  |

|                                                           |                                                      |           |            |          |           |             |
|-----------------------------------------------------------|------------------------------------------------------|-----------|------------|----------|-----------|-------------|
| <b>Fatty acid and phospholipid metabolism</b>             |                                                      |           | <b>4</b>   |          |           | <b>48</b>   |
|                                                           | Biosynthesis                                         |           | 3          |          |           | 32          |
|                                                           | Degradation                                          |           | 1          |          |           | 15          |
|                                                           | Other                                                |           |            |          |           | 1           |
| <b>Hypothetical proteins</b>                              |                                                      | <b>6</b>  | <b>20</b>  | <b>1</b> | <b>21</b> | <b>377</b>  |
|                                                           | Conserved                                            | 4         | 16         | 1        | 10        | 238         |
|                                                           | Unknown                                              | 2         | 4          |          | 11        | 139         |
| <b>Mobile and extrachromosomal element functions</b>      |                                                      | <b>1</b>  | <b>3</b>   |          | <b>4</b>  | <b>66</b>   |
|                                                           | Other                                                |           | 3          |          |           | 10          |
|                                                           | Prophage functions                                   |           |            |          | 1         | 20          |
|                                                           | Transposon functions                                 | 1         |            |          | 3         | 36          |
| <b>Protein fate</b>                                       |                                                      |           | <b>4</b>   |          | <b>3</b>  | <b>115</b>  |
|                                                           | Degradation of proteins, peptides, and glycopeptides |           | 2          |          | 3         | 69          |
|                                                           | Protein and peptide secretion and trafficking        |           |            |          |           | 16          |
|                                                           | Protein folding and stabilization                    |           | 2          |          |           | 19          |
|                                                           | Protein modification and repair                      |           |            |          |           | 11          |
| <b>Protein synthesis</b>                                  |                                                      | <b>1</b>  | <b>2</b>   |          | <b>1</b>  | <b>157</b>  |
|                                                           | tRNA aminoacylation                                  |           |            |          |           | 1           |
|                                                           | Nucleoproteins                                       |           |            |          |           | 1           |
|                                                           | Other                                                |           |            |          |           | 2           |
|                                                           | Ribosomal proteins: synthesis and modification       | 1         | 1          |          | 1         | 78          |
|                                                           | Translation factors                                  |           |            |          |           | 18          |
|                                                           | tRNA aminoacylation                                  |           | 1          |          |           | 29          |
|                                                           | tRNA and rRNA base modification                      |           |            |          |           | 28          |
| <b>Purines, pyrimidines, nucleosides, and nucleotides</b> |                                                      | <b>4</b>  | <b>5</b>   |          |           | <b>61</b>   |
|                                                           | 2'-Deoxyribonucleotide metabolism                    | 2         |            |          |           | 7           |
|                                                           | Nucleotide and nucleoside interconversions           |           |            |          |           | 6           |
|                                                           | Other                                                |           |            |          |           | 3           |
|                                                           | Purine ribonucleotide biosynthesis                   | 2         | 2          |          |           | 16          |
|                                                           | Pyrimidine ribonucleotide biosynthesis               |           |            |          |           | 12          |
|                                                           | Salvage of nucleosides and nucleotides               |           | 3          |          |           | 16          |
|                                                           | Sugar-nucleotide biosynthesis and conversions        |           |            |          |           | 1           |
| <b>Regulatory functions</b>                               |                                                      | <b>5</b>  | <b>4</b>   | <b>1</b> |           | <b>137</b>  |
|                                                           | DNA interactions                                     | 2         | 1          |          |           | 35          |
|                                                           | Other                                                | 3         | 3          | 1        |           | 85          |
|                                                           | Protein interactions                                 |           |            |          |           | 9           |
|                                                           | RNA interactions                                     |           |            |          |           | 7           |
|                                                           | Small molecule interactions                          |           |            |          |           | 1           |
| <b>Signal transduction</b>                                |                                                      |           |            |          |           | <b>18</b>   |
|                                                           | PTS                                                  |           |            |          |           | 1           |
|                                                           | Two-component systems                                |           |            |          |           | 17          |
| <b>Transcription</b>                                      |                                                      | <b>1</b>  | <b>1</b>   | <b>1</b> |           | <b>63</b>   |
|                                                           | Degradation of RNA                                   |           |            |          |           | 6           |
|                                                           | DNA-dependent RNA polymerase                         |           |            |          |           | 9           |
|                                                           | Other                                                | 1         |            |          |           | 2           |
|                                                           | RNA processing                                       |           |            |          |           | 12          |
|                                                           | Transcription factors                                |           | 1          | 1        |           | 34          |
| <b>Transport and binding proteins</b>                     |                                                      | <b>18</b> | <b>28</b>  |          | <b>1</b>  | <b>256</b>  |
|                                                           | Amino acids, peptides and amines                     | 4         | 9          |          |           | 62          |
|                                                           | Anions                                               |           |            |          |           | 6           |
|                                                           | Carbohydrates, organic alcohols, and acids           | 4         | 4          |          | 1         | 32          |
|                                                           | Cations and iron carrying compounds                  | 6         | 5          |          |           | 51          |
|                                                           | Nucleosides, purines and pyrimidines                 |           | 1          |          |           | 5           |
|                                                           | Other                                                | 1         | 4          |          |           | 28          |
|                                                           | Unknown substrate                                    | 3         | 5          |          |           | 72          |
| <b>Unknown function</b>                                   |                                                      | <b>7</b>  | <b>14</b>  | <b>1</b> | <b>9</b>  | <b>328</b>  |
|                                                           | Enzymes of unknown specificity                       | 4         | 5          |          | 2         | 65          |
|                                                           | General                                              | 3         | 9          | 1        | 7         | 263         |
| <b>Total</b>                                              |                                                      | <b>72</b> | <b>123</b> | <b>7</b> | <b>57</b> | <b>2325</b> |
